# Supplementary material
Source: PubMed Central journal article supplement (PMC3146296)
Supplement: NIHMS313119-supplement-4.pdf [file NIHMS313119-supplement-4.pdf]

1 Supplementary Figures

2  
3  
4

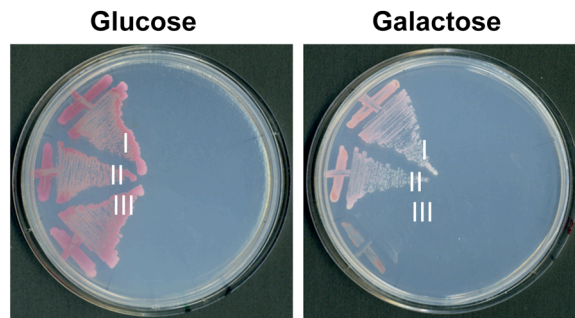

5  
6  
7  
8  
9  
10  
11  
12  
13

**Fig. S1 SidD is unable to suppress the toxicity of AnkX.** Plasmids that direct the expression of SidD were introduced into yeast strains expressing AnkX or SidM from a galactose-dependent promoter. Yeast cells grown on glucose plates were streaked onto plates containing glucose (left) or galactose (right). The growth of yeast cells was documented after incubation at 30°C for 3 days. Strains: I, vector/vector; II, pSidM/pSidD; III, pAnkX/pSidD.

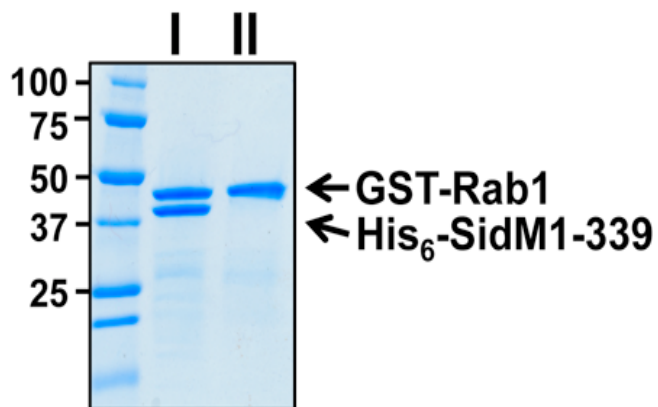

14  
15  
16  
17  
18  
19  
20  
21

**Fig. S2 SidM(1-339) can be removed from the AMPylation reaction.** GST-Rab1 associated with glutathione beads was incubated with His<sub>6</sub>-SidM1-339 and ATP for 30 min at 35°C to allow for AMPylation of Rab1. The beads were split into samples and one (II) was subjected to be washed with a regime described in Materials and Methods. The retained proteins were resolved by SDS-PAGE and visualized by Commassie brilliant blue staining. Note that even an excessive amount of His<sub>6</sub>-SidM1-339 was used, the level of this protein was beyond detection after washing.

1  
2

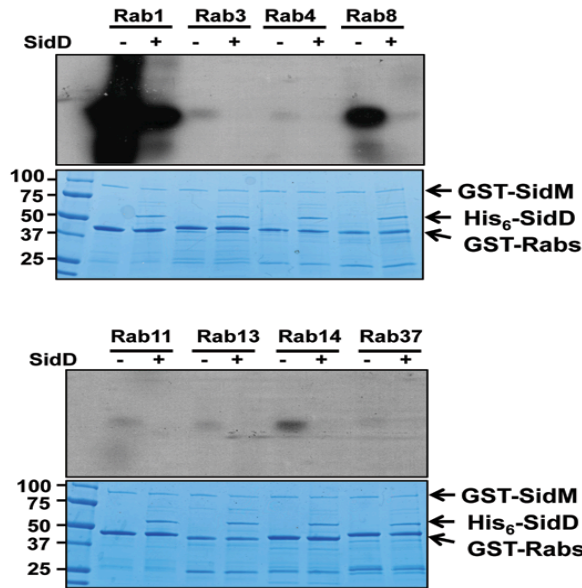

3  
4  
5  
6  
7  
8  
9  
10  
11  
12

**Fig. S3 SidD deAMPylates other Rab proteins modified by SidM.** Indicated GST-Rab proteins purified from *E. coli* were incubated with GST-SidM and of  $^{32}\text{P}$ - $\alpha$ -ATP for 30 min at 35°C. Each sample was split into two reactions and His<sub>6</sub>-SidD was added to one of the reactions. After further incubation for 30 min, the proteins were separated by SDS-PAGE and AMPylated GST-Rabs were detected by autoradiograph (upper panels) and the proteins in the gels were visualized by commassie brilliant blue (lower panels). Note that the efficiency of AMPylation toward other Rab proteins by SidM is significantly lower.

1

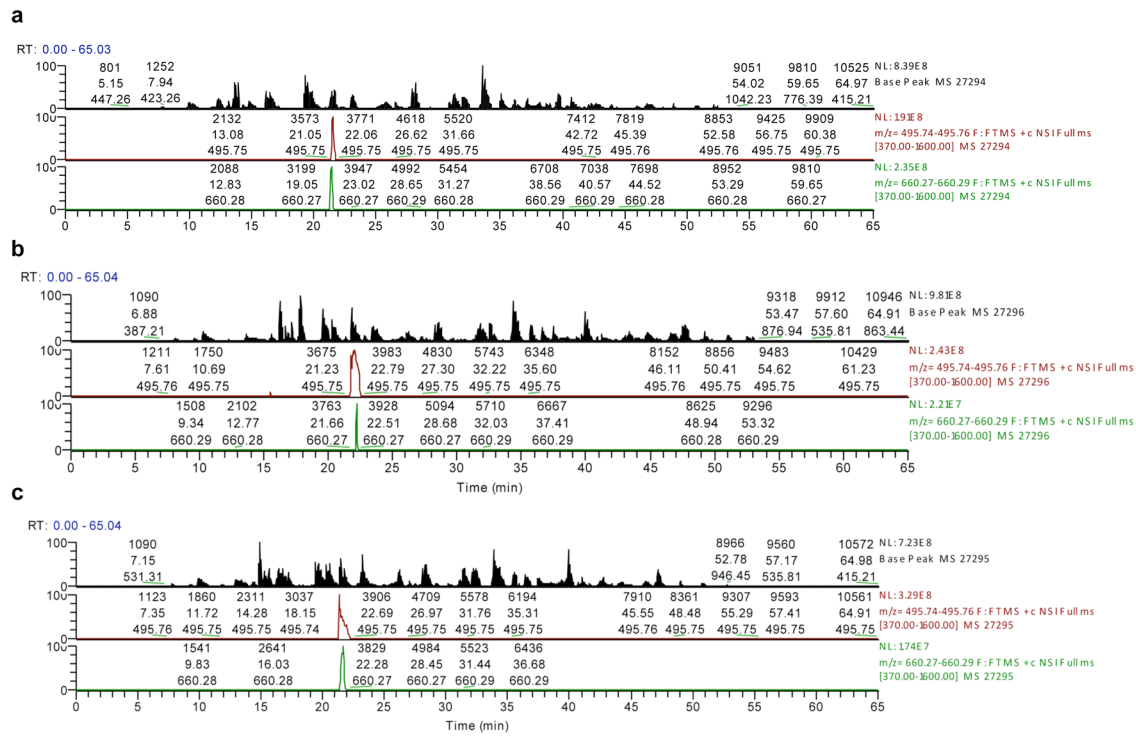

2

3

4 **Fig. S4 Mass spectrometric analysis of deAMPylation of Rab1 by SidD.** GST-Rab1 was5 incubated with GST-SidM in the presence of ATP for 30 min. A sample was withdrawn **(a)** before6 adding His<sub>6</sub>-SidD, identical samples were further withdrawn after incubation for 10 **(b)** and 30 **(c)**

7 min, respectively. After resolved by SDS-PAGE, protein bands corresponding to GST-Rab1 was

8 excised, digested with trypsin and analyzed by mass spectrometry. On each chromatogram, data of

9 the relative intensity ratio for modified Rab1 (green) and unmodified Rab1 (red) were shown. The

10 ratio of unmodified Rab1 increased about 10-fold when 4 μg His<sub>6</sub>-SidD was added to the reaction

11 for 10 min and further increased to 20-fold when the incubation was extended for 30 min (Fig. S4

12 **b-c).**

13

14

15

16

17

18

19

20

21



1  
2  
3

Table S1 Sequences of primers used in this study

| Name                   | Sequence                                            | note                                                  |
|------------------------|-----------------------------------------------------|-------------------------------------------------------|
| SidD-5'                | ATAGGATCCTTGGTATATTATGAGATC                         | <i>Bam</i> HI for SidD cloning                        |
| SidD-3'                | ATAGTCGACTTAAATAGTAAGACTCG                          | <i>Sal</i> I for SidD cloning                         |
| SidM-5'                | ATAGGATCCATGAGCATAATGGGGAG                          | <i>Bam</i> HI for SidM cloning                        |
| SidM-3'                | ATAGTCGACTTATTTTATCTTAATGG                          | <i>Sal</i> I for SidM cloning                         |
| SidM 1-339-3'          | ATAGTCGACTTAACGTTGAACACCCAGCTC                      | <i>Sal</i> I for SidM<br>AMPylation domain<br>cloning |
| Rab1-5'                | ATAGGATCCATGTCCAGCATGAATCC                          | <i>Bam</i> HI for Rab1 cloning                        |
| Rab1-3'                | ATAGTCGACTTAGCAGCAACCTCCAC                          | <i>Sal</i> I for Rab1 cloning                         |
| SidD D60A up           | AAGCTATCAATCTGGTTCCAATGCTTTAGAT<br>AAGGGTAATAGTGAAG | SidD mutation D61A                                    |
| SidD D60A down         | TTTCACTATTACCCTTATCTAAAGCATTGGAA<br>CCAGATTGATAGCTT | SidD mutation D61A                                    |
| SidD D92A up           | TATAAAGCACAAGGATTCTGACGCTAAAATA<br>GTCATTGGATATACCA | SidD mutation D92A                                    |
| SidD D92A down         | TGGTATATCCAATGACTATTTTAGCGTCAGA<br>ATCCTTGTGCTTTATA | SidD mutation D92A                                    |
| SidD D110A up          | GCTTTTCAAATAGTGGTGGCTGGCTTTTATGG<br>ATGCGAA         | SidD mutation D110A                                   |
| SidD D110A<br>down     | TTCGCATCCATAAAAGCCAGCCACCACTATT<br>TGAAAAGC         | SidD mutation D110A                                   |
| SidD Knockin 1 5'      | ATAGTCGACATCTTTTATGAATTGCATTATAC<br>C               | <i>Sal</i> I for SidD upstream                        |
| SidD Knockin 2 3'      | ATAGGATCCATGATATACTTAATTACAAGTA<br>GAG              | <i>Bam</i> HI for SidD<br>upstream                    |
| SidD Knock In3         | ATA CCATGG TTAAATAGTAAGACTCGAG                      | <i>Nco</i> I for SidD<br>downstream                   |
| SidD Knock In4         | ATA GCGGCCGC TTTAGGATTTCAATCAG                      | <i>Not</i> I for SidD<br>downstream                   |
| SidD FLAG NT           | ATA GGATCC ATG<br>GACTACAAAGACGATGACGACAAG          | <i>Bam</i> HI for N-terminal<br>FLAG- SidD            |
| SidD 3' <i>Nco</i> I   | ATACCATGGGTATTATAAGTTCATTATG                        | <i>Nco</i> I for SidD                                 |
| Rab3-5' <i>Bam</i> HI  | ATAGGATCCATGGCATCCGCCACAGACTCGC                     |                                                       |
| Rab3-3' <i>Sal</i> I   | ATAGTCGACTCAGCAGGCGCAGTCCTGGTGC<br>G                |                                                       |
| Rab4-5' <i>Bgl</i> II  | ATAAGATCTATGGCTGAGACCTACGACTTCC                     |                                                       |
| Rab4-3' <i>Sal</i> I   | ATAGTCGACTCAGCAGCCACACGGCTGAGGG                     |                                                       |
| Rab8-5' <i>Bam</i> HI  | ATAGGATCCATGGCGAAGACCTACGATTACC                     |                                                       |
| Rab8-3' <i>Sal</i> I   | ATAGTCGACTCACAGAAGAACACATCGGAA<br>AAAGC             |                                                       |
| Rab11-5' <i>Bam</i> HI | ATAGGATCCATGGGCACCCGCGACGACGAG                      |                                                       |
| Rab11-3' <i>Sal</i> I  | ATAGTCGACTTAGATGTTCTGACAGCACTGC                     |                                                       |

---

|                        |                                               |
|------------------------|-----------------------------------------------|
| Rab13-5' <i>Bam</i> HI | ATAG <u>GATCC</u> ATGGCCAAAGCCTACGACCAC       |
| Rab13-3' <i>Sal</i> I  | ATAG <u>TCGACT</u> CAGCCCAGGGAGCACTTGTTG<br>G |
| Rab14-5' <i>Bam</i> HI | ATAG <u>GATCC</u> ATGGCAACTGCACCATACT<br>AC   |
| Rab14-3' <i>Sal</i> I  | ATAG <u>TCGACCT</u> AGCAGCCACAGCCTTCTCTC      |
| Rab37-5' <i>Bam</i> HI | ATAG <u>GATCC</u> ATGACGGGCACGCCAGGCGCCG      |
| Rab37-3' <i>Sal</i> I  | ATAG <u>TCGACT</u> CACATGAAGGAGCAGCAGCTG      |

---

1  
2  
3  
4  
5

Note: Sequences for restriction sites used for subcloning or for site-directed mutagenesis were underlined.
